# Supplementary material
Source: Springer Nature journal article supplement (https://www.springermedizin.de/resource/supplementary/12899_2010_173_MOESM4_ESM.pdf/9514636)

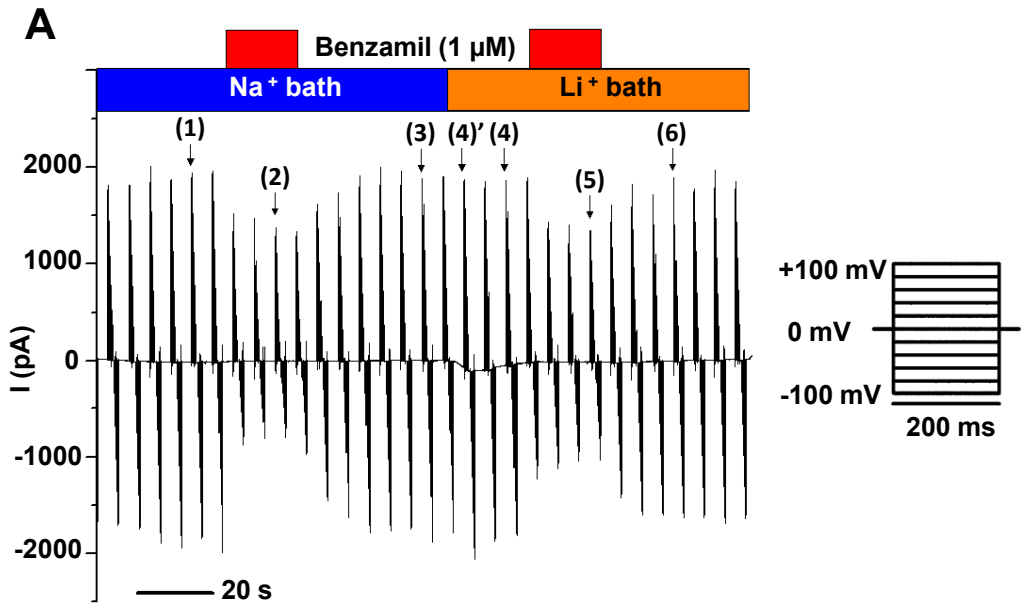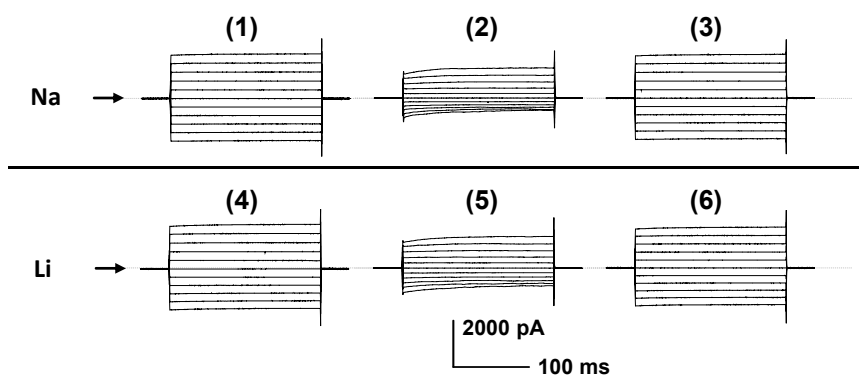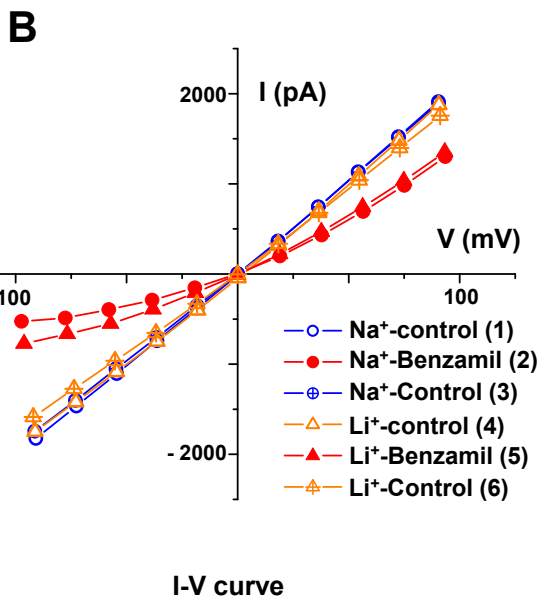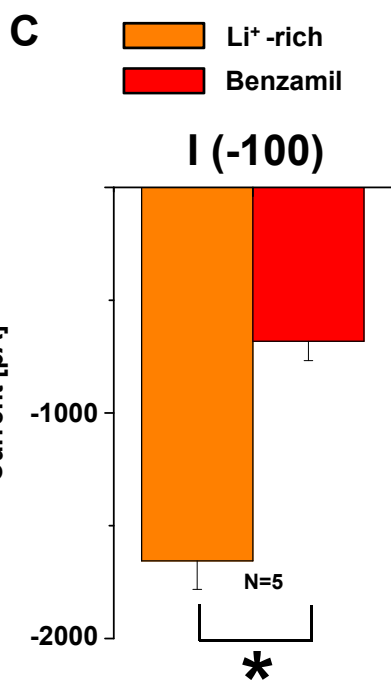

Supplement: MOESM4 [file 9514636]
